# Supplementary material
Source: Springer Nature journal article supplement (https://www.springermedizin.de/resource/supplementary/12885_2011_2853_MOESM8_ESM.pdf/9462124)

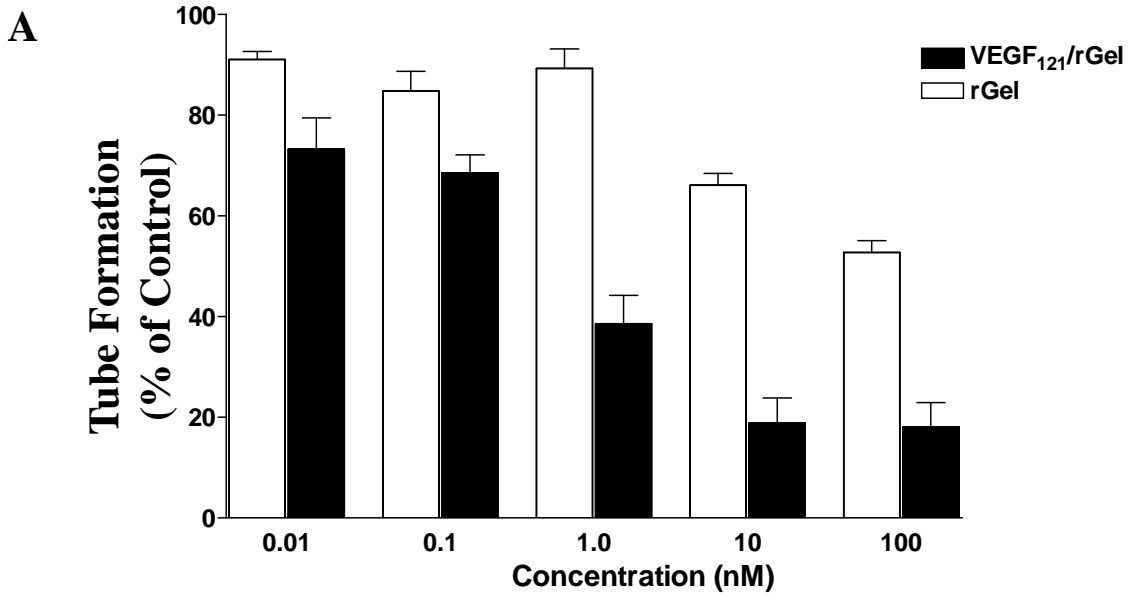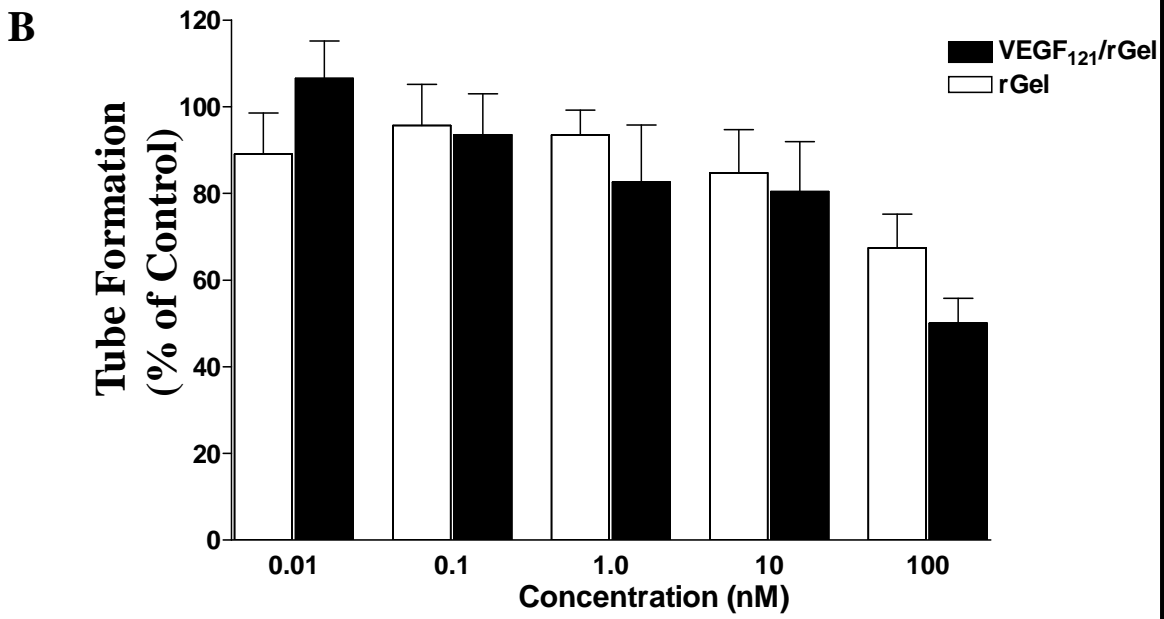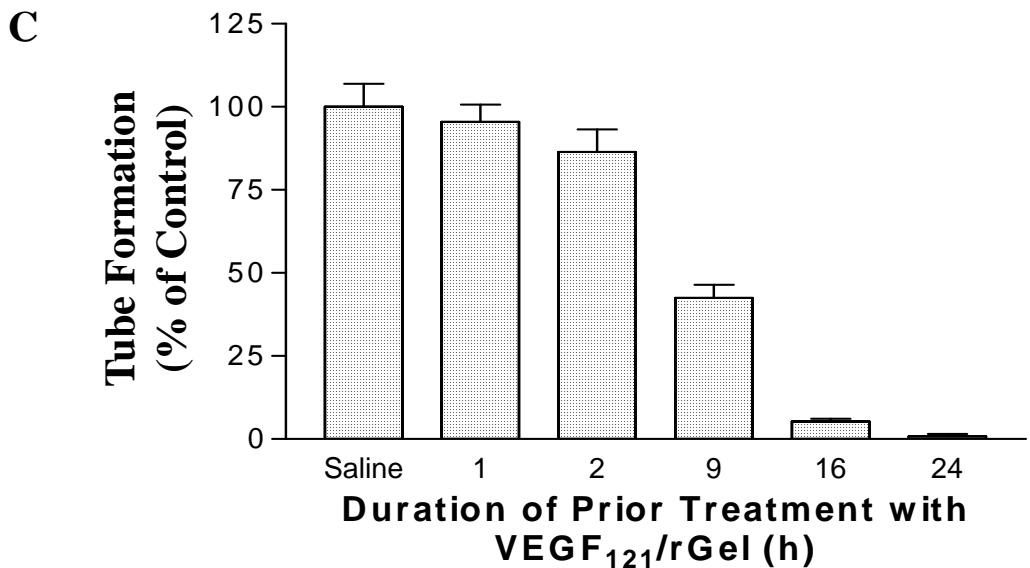

Supplement: MOESM8 [file 9462124]
